# Supplementary material for: Fabrication and characterization of antifouling carbon nanotube/polyethersulfone ultrafiltration membranes
Source: Royal Society of Chemistry journal article supplement (doi:10.1039/c6ra02991d), 2016-01-01
Supplement: c6ra02991d1.pdf [file c6ra02991d1.pdf]

## Supporting information

### **Fabrication and characterization of antifouling carbon nanotube/polyethersulfone ultrafiltration membranes**

Qi Zhang<sup>a, b</sup>, Yuan Liu<sup>a, b</sup>, Yanlei Su<sup>a, b\*</sup>, Runnan Zhang<sup>a, b</sup>, Lin Fan<sup>a, b</sup>, Yanan Liu<sup>a, b</sup>,  
Tianyi Ma<sup>a, b</sup>, Zhongyi Jiang<sup>a, b</sup>

<sup>a</sup> *Key Laboratory for Green Chemical Technology, School of Chemical Engineering  
and Technology, Tianjin University, Tianjin 300072, China*

<sup>b</sup> *Collaborative Innovation Center of Chemical Science and Engineering (Tianjin),  
Tianjin University, Tianjin 300072, China*

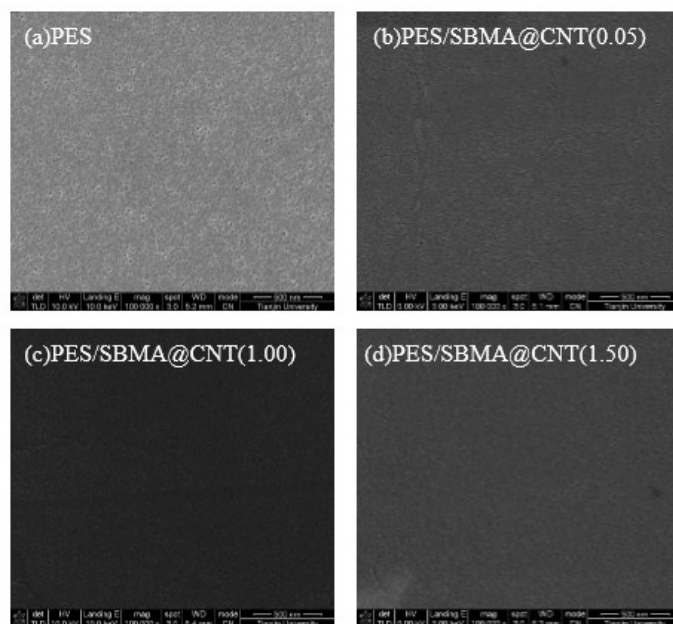

Fig. S1 The membrane surfaces FESEM of PES, PES/SBMA@CNT (0.50), PES/SBMA@CNT (1.00), and PES/SBMA@CNT (1.50) membranes.
